# Supplementary material for: Solution-processable hierarchical SiNW/PEDOT/MnOx electrodes for high-performance supercapacitors
Source: Royal Society of Chemistry journal article supplement (doi:10.1039/d2qm00544a), 2022-01-01
Supplement: d2qm00544a1.pdf [file d2qm00544a1.pdf]

# Supporting Information for

## **Solution-processable hierarchical SiNWs/PEDOT/MnO<sub>x</sub> electrodes for high-performance supercapacitors**

Xiaojuan Shen,<sup>a</sup> \* Xinyue Wei,<sup>a</sup> Tongfei Wang,<sup>a</sup> Sumin Li,<sup>a</sup> and Haitao Li<sup>b</sup> \*

<sup>a</sup> Research School of Polymeric Materials, School of Materials Science & Engineering, Jiangsu University, Zhenjiang, Jiangsu Province, 212013, China.

<sup>b</sup> Institute for Energy Research, School of Chemistry and Chemical Engineering, Jiangsu University, Zhenjiang, Jiangsu Province, 212013, China.

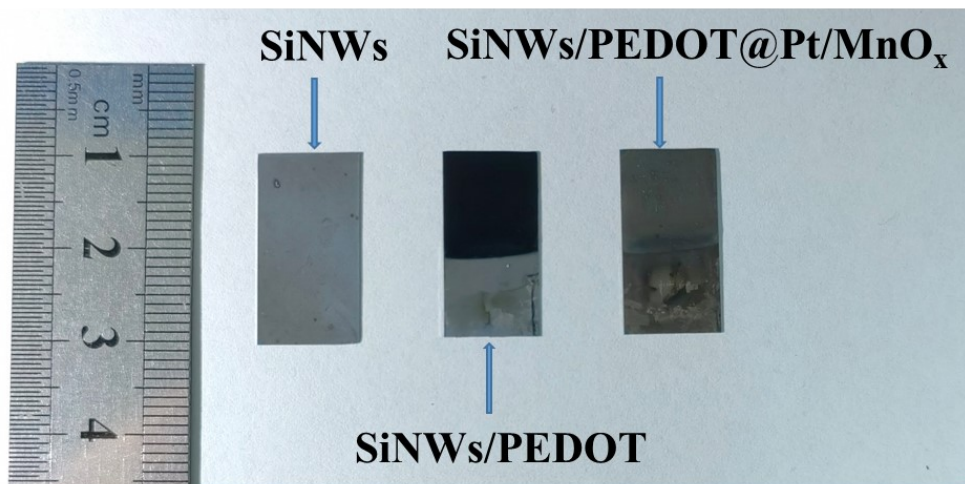

**Fig. S1.** Photos of different composites.

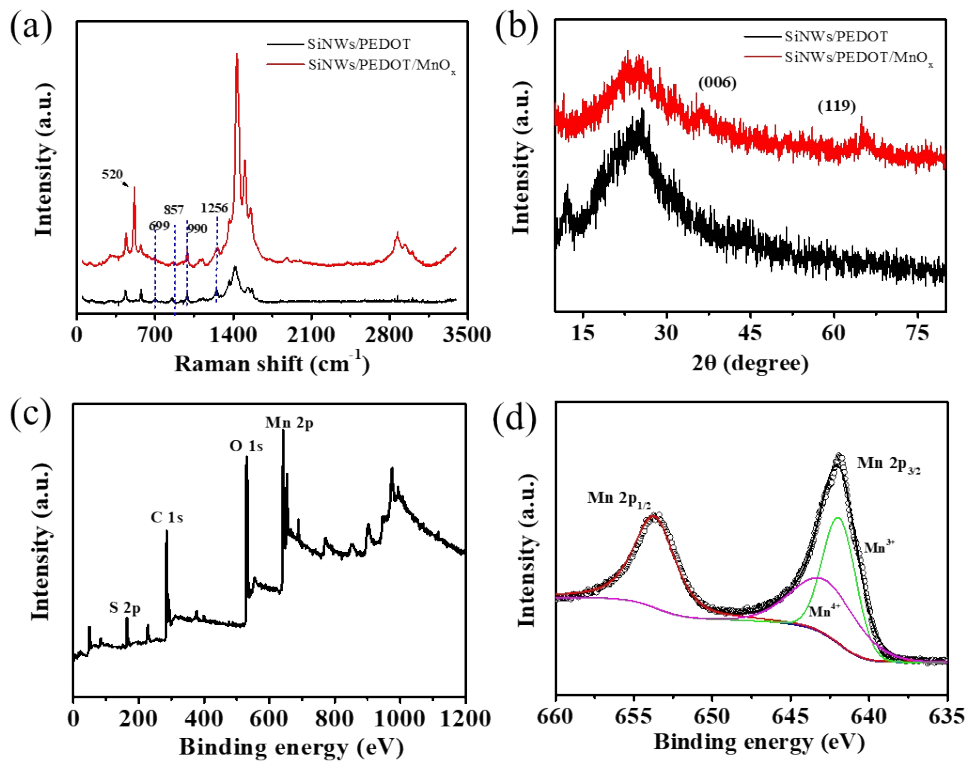

**Fig. S2.** (a) Raman data and (b) X-ray diffraction of SiNWs/PEDOT and SiNWs/PEDOT/MnO<sub>x</sub>; (c) XPS survey spectra and (d) Mn 2P region of XPS spectrum obtained from SiNWs/PEDOT/MnO<sub>x</sub>.

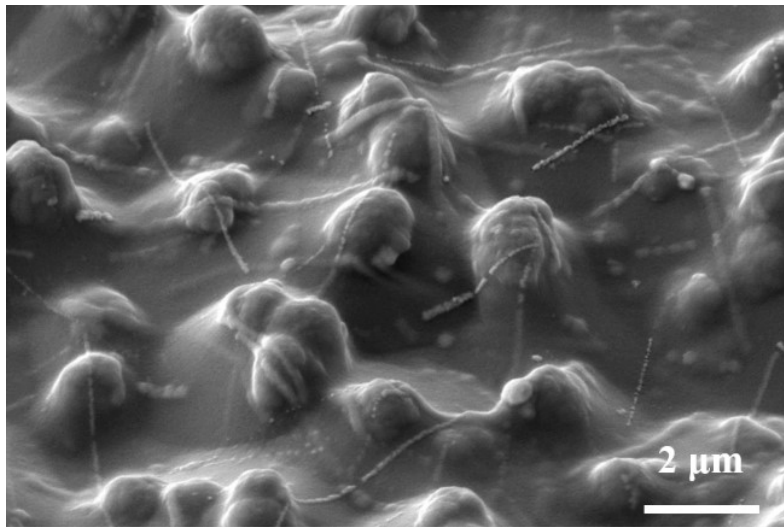

**Fig. S3.** 45 degree angle SEM image of SiNWs/PEDOT@Pt/MnO<sub>x</sub> electrode.

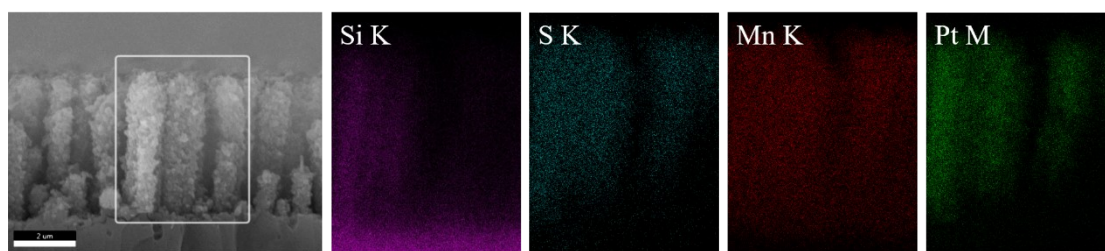

**Fig. S4.** SEM image of the SiNWs/PEDOT@Pt/MnO<sub>x</sub> composite and corresponding

EDS elemental mapping of Si, S, Mn, and Pt.

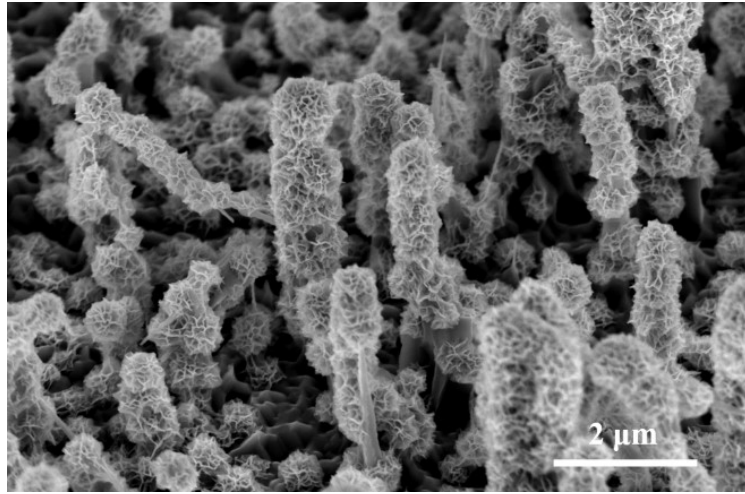

**Fig. S5.** SEM of SiNWs/MnO<sub>x</sub>.

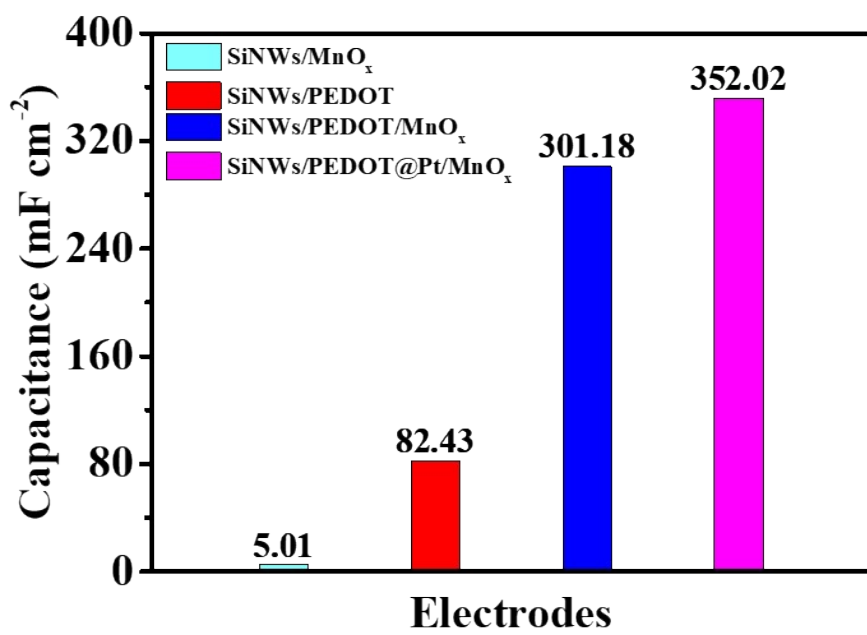

Fig. S6. Areal capacitance values of different electrodes at 2 mA cm<sup>-2</sup>.

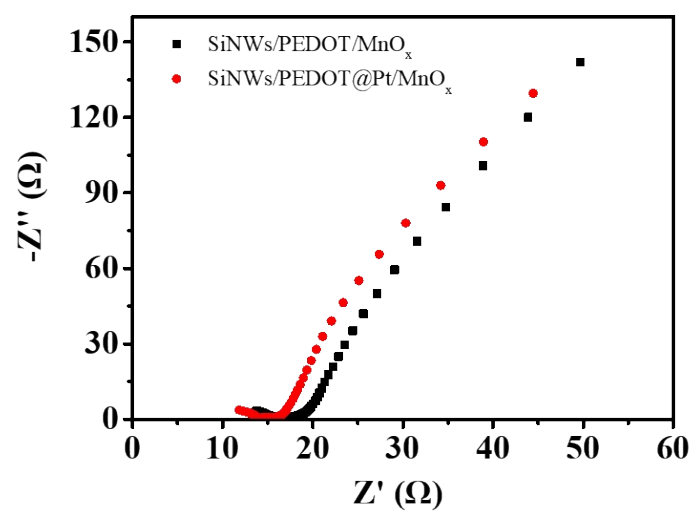

**Fig. S7.** EIS spectra of  $\text{SiNWs/PEDOT/MnO}_x$  and  $\text{SiNWs/PEDOT@Pt/MnO}_x$  electrodes

in 1 M  $\text{Na}_2\text{SO}_4$ .



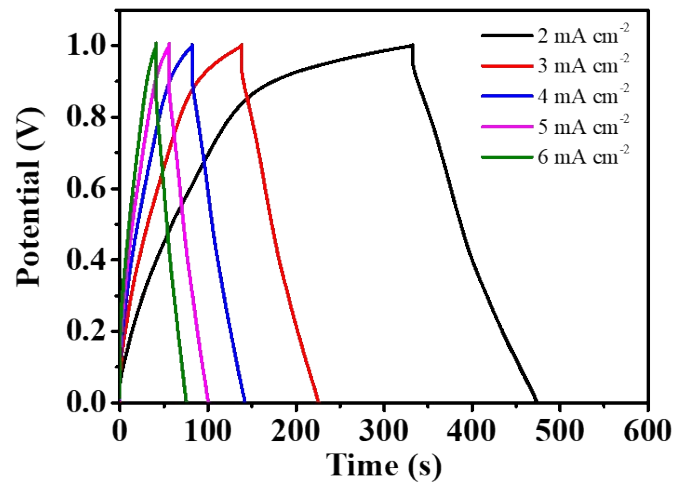

**Fig. S8.** GCD curves under different current densities from 2 to 6 mA cm<sup>-2</sup> for the SiNWs/PEDOT/MnO<sub>x</sub> electrode.

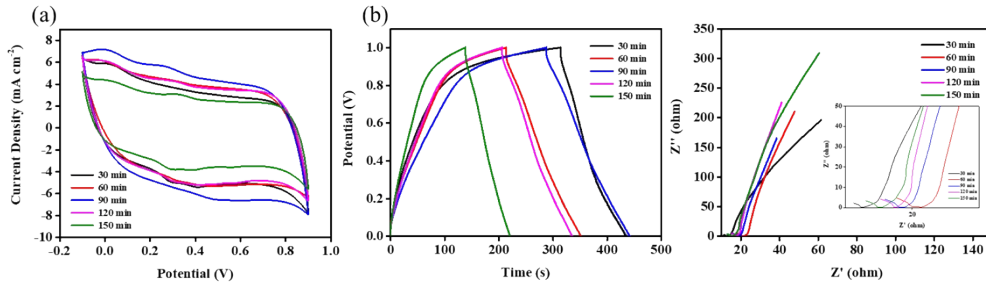

**Fig. S9.** Electrochemical performances of SiNWs/PEDOT/MnO<sub>x</sub> electrodes prepared with electrodeposition times of PEDOT for 15 min dipped in 15 mM KMnO<sub>4</sub> for 50 min. (a) CV curves at the scan rate of 20 mV s<sup>-1</sup>, (b) GCD curves at the current density of 2 mA cm<sup>-2</sup>, (c) EIS spectra.

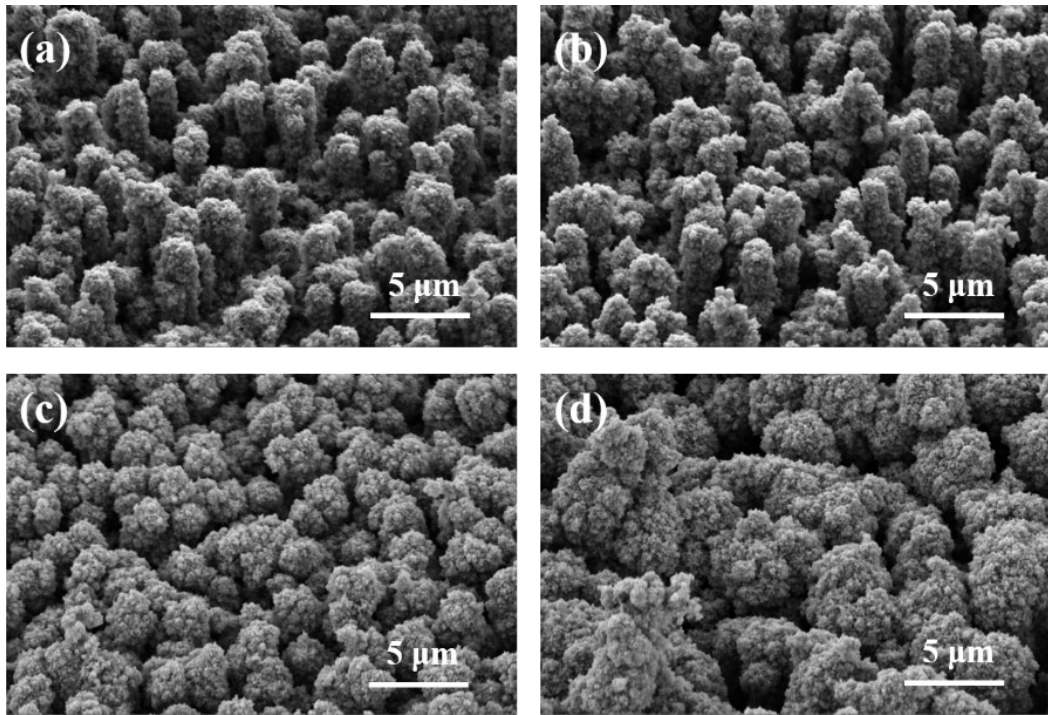

**Fig. S10.** SEM images of SiNWs/PEDOT prepared with electrodeposition times (a) 10min, (b) 15min, (c) 20min, (d) 25min.

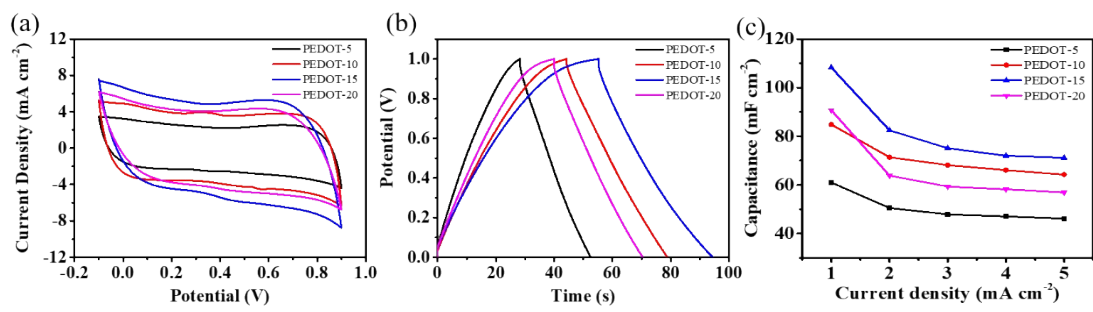

**Fig. S11.** Electrochemical performances of SiNWs/PEDOT electrodes prepared with electrodeposition times of PEDOT. (a) CV curves at the scan rate of  $50 \text{ mV s}^{-1}$ , (b) GCD curves at the current density of  $2 \text{ mA cm}^{-2}$ , (c) Area capacitance of each electrode at different current densities was calculated according to GCD curve.

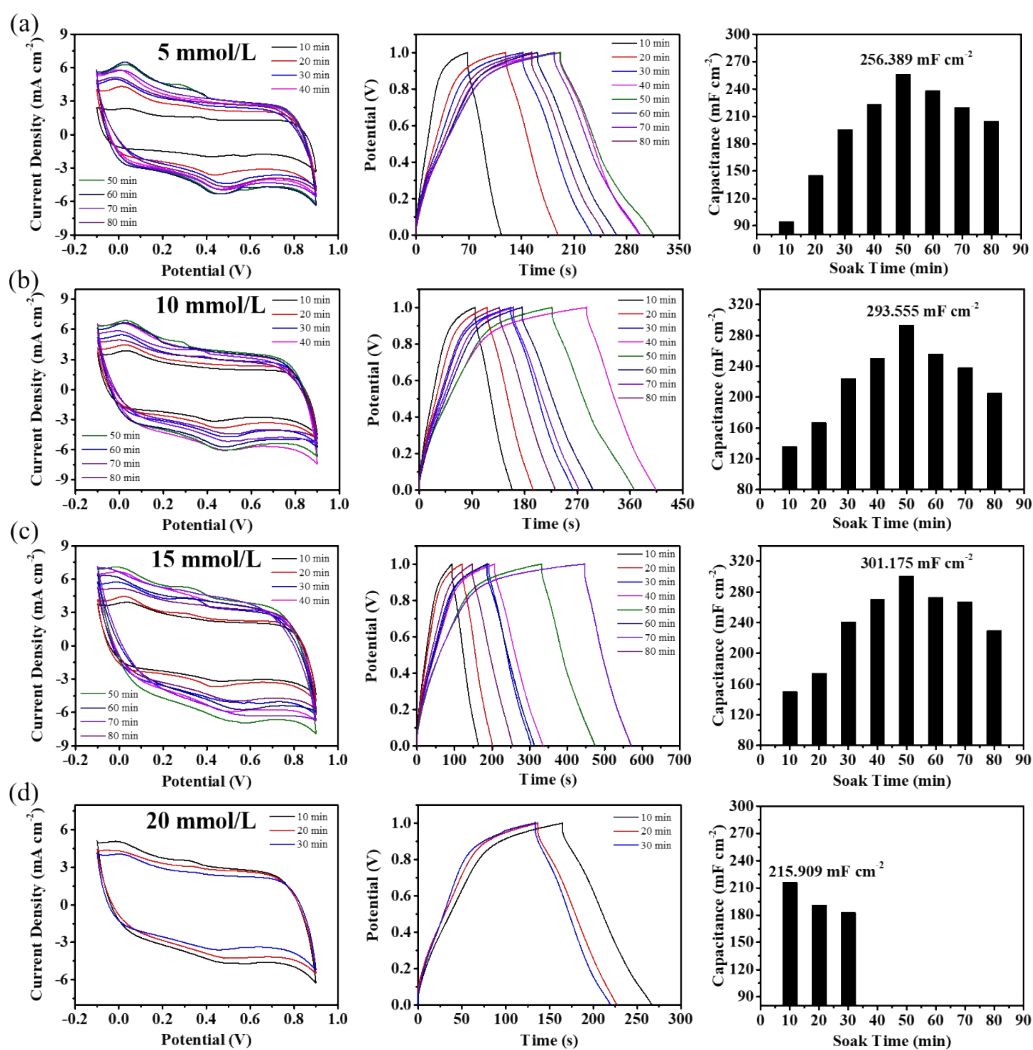

**Fig. S12.** Electrochemical performances of SiNWs/PEDOT/MnO<sub>x</sub> electrodes prepared with electrodeposition times of PEDOT for 15 and dipped in different concentration KMnO<sub>4</sub> for various time. (a) 5 mM, (b) 10 mM, (c) 15 mM and (d) 20 mM.

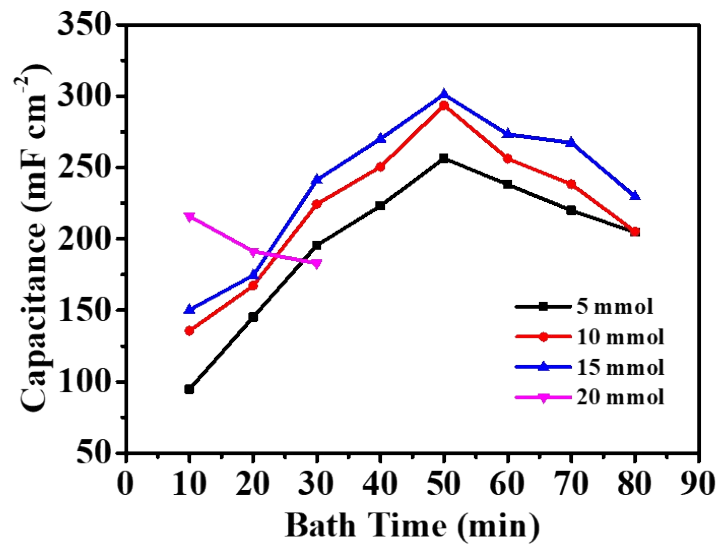

**Fig. S13.** Areal capacitance values of the SiNWs/PEDOT/MnO<sub>x</sub> electrodes with different KMnO<sub>4</sub> concentrations along with the bath time.

**Table S1** Performance comparison of Si/PEDOT@Pt/MnO<sub>x</sub> symmetry capacitor with previous devices.

| System                        | Electrolyte                                   | E(mWh/cm <sup>2</sup> ) | P(mW/cm <sup>2</sup> ) | Refs      |
|-------------------------------|-----------------------------------------------|-------------------------|------------------------|-----------|
| PEDOT/PPy/SiNWs               | PYR <sub>13</sub> TFSI                        | 0.0146                  | 0.315                  | 1         |
| PEDOT/D/SiNWs                 | N <sub>1114</sub> TFSI                        | 0.007                   | 1.3                    | 2         |
| PEDOT coated SiNWs            | N <sub>1114</sub> TFSI                        | 0.0092                  | 0.11                   | 3         |
| MnO <sub>x</sub> /C/PSiNW     | 0.1M EMIM-TFSI                                | 0.555                   | 0.48                   | 4         |
| MnO <sub>2</sub> /SiNWs       | PYR <sub>13</sub> TFSI/<br>LiClO <sub>4</sub> | 0.0091                  | 0.388                  | 5         |
| Si-TNR/TiN/ MnO <sub>2</sub>  | 1M Na <sub>2</sub> SO <sub>4</sub>            | 0.003                   | 0.1                    | 6         |
| SiNWs@MnO <sub>2</sub>        | 1M Na <sub>2</sub> SO <sub>4</sub>            | 3.34×10 <sup>-5</sup>   | 0.14                   | 7         |
| MnO <sub>x</sub> /PEDOT/SiNWs | 1M Na <sub>2</sub> SO <sub>4</sub>            | 0.0409                  | 0.524                  | This Work |
|                               | PVA/ Na <sub>2</sub> SO <sub>4</sub>          | 0.0133                  | 0.275                  |           |

## References

1. Q. Zhou, Y. Zhou, M. Bao and X. Ni, Modified silicon nanowires@ polypyrrole core-shell nanostructures by poly (3, 4-ethylenedioxythiophene) for high performance on-chip micro-supercapacitors, *Applied Surface Science*, 2019, **487**, 236-243.
2. D. Aradilla, F. Gao, G. Lewes-Malandrakis, W. Müller-Sebert, P. Gentile, M. Boniface, D. Aldakov, B. Iliev, T. J. Schubert and C. E. Nebel, Designing 3D multihierarchical heteronanostructures for high-performance on-chip hybrid supercapacitors: poly (3, 4-(ethylenedioxy) thiophene)-coated diamond/silicon nanowire electrodes in an aprotic ionic liquid, *ACS Applied Materials & Interfaces*, 2016, **8**, 18069-18077.
3. X. Shen, C. Liu, X. Zhang, J. Li, J. Zhao and S. Li, High capacitive PEDOT-coated SiNWs electrode for micro-supercapacitors with facile preparation, *Journal of Inorganic and Organometallic Polymers and Materials*, 2020, **30**, 3722-3734.
4. S. Ortaboy, J. P. Alper, F. Rossi, G. Bertoni, G. Salviati, C. Carraro and R. Maboudian, MnO<sub>x</sub>-decorated carbonized porous silicon nanowire electrodes for high performance supercapacitors, *Energy & Environmental Science*, 2017, **10**, 1505-1516.
5. D. P. Dubal, D. Aradilla, G. Bidan, P. Gentile, T. J. Schubert, J. Wimberg, S. Sadki and P. Gomez-Romero, 3D hierarchical assembly of ultrathin MnO<sub>2</sub> nanoflakes on silicon nanowires for high performance micro-supercapacitors in Li-doped ionic liquid, *Scientific reports*, 2015, **5**, 1-10.
6. P. Lu, E. Halvorsen, P. Ohlckers, L. Müller, S. Leopold, M. Hoffmann, K. Grigoras, J. Ahopelto, M. Prunnila and X. Chen, Ternary composite Si/TiN/MnO<sub>2</sub> taper nanorod array for on-chip supercapacitor, *Electrochimica Acta*, 2017, **248**, 397-408.
7. A. Soam, K. Parida, R. Kumar and R. O. Dusane, Silicon-MnO<sub>2</sub> core-shell nanowires as electrodes for micro-supercapacitor application, *Ceramics International*, 2019, **45**, 18914-18923.
